# Supplementary material for: Middle Holocene Climate Oscillations Recorded in the Western Dvina Lakeland
Source: MDPI journal article supplement (doi:10.3390/w13111611), 2021-06-07

Map of sites mentioned in Table S1

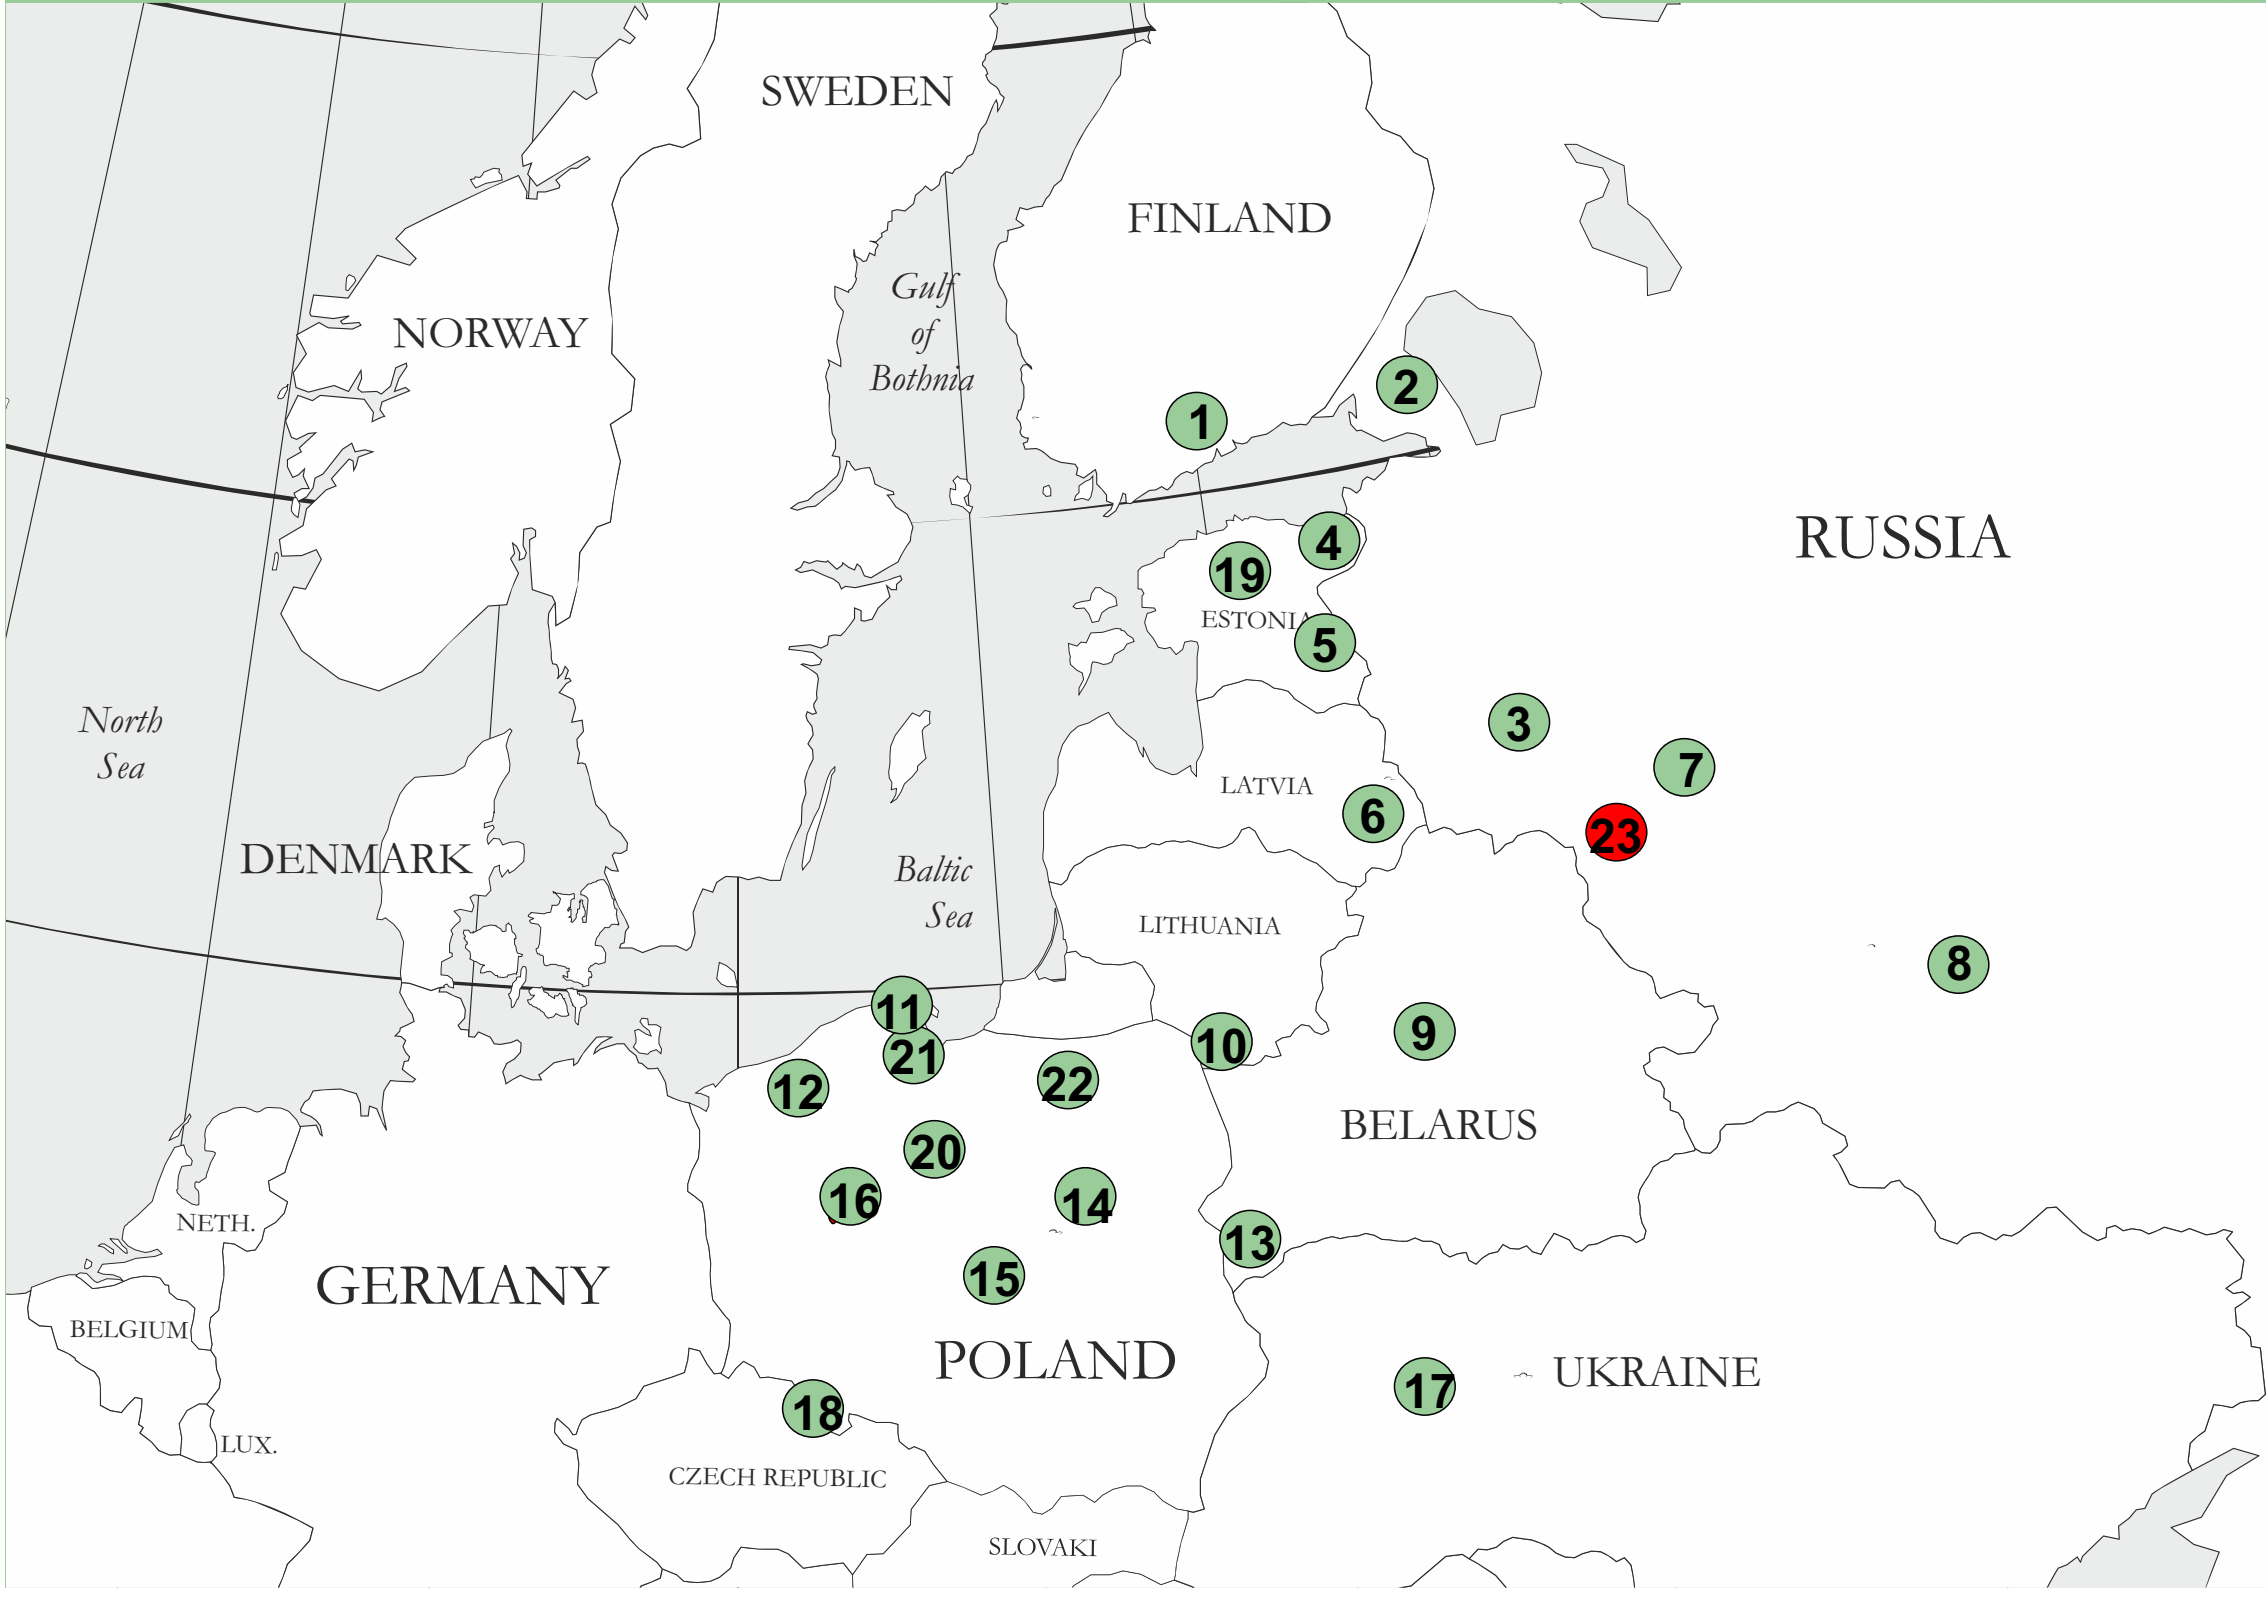

1. Hirvijärvi, Finland
2. Medvedevskoe, Russia
3. Polistovo-Lovatskaya mire system, Russia
4. Liivjarve Bog, Estonia
5. Raigastvere Lake, Estonia
6. Lake Kurjanova, Latvia
7. Staroselsky Moch, Russia
8. Peatland Klukva, Russia
9. Sudoble Lake, Belarus
10. Bebrukas Lake, Lithuania
11. Darzłubie Bog, Poland
12. Lake Spore, Poland
13. Oltush Lake, Belarus
14. Błędowo Lake, Poland
15. Żabieniec Bog, Poland
16. Biskupińskie Lake, Poland
17. Zalizhtsy, Ukraine
18. Vernéřovice, Czech Republic
19. Männikjärve bog, Estonia
20. Głęboćek, Poland
21. Stążki, Poland
22. Gązwa, Poland
23. Serteya

Temperature values of warmest month 4.2 ka cal. BP

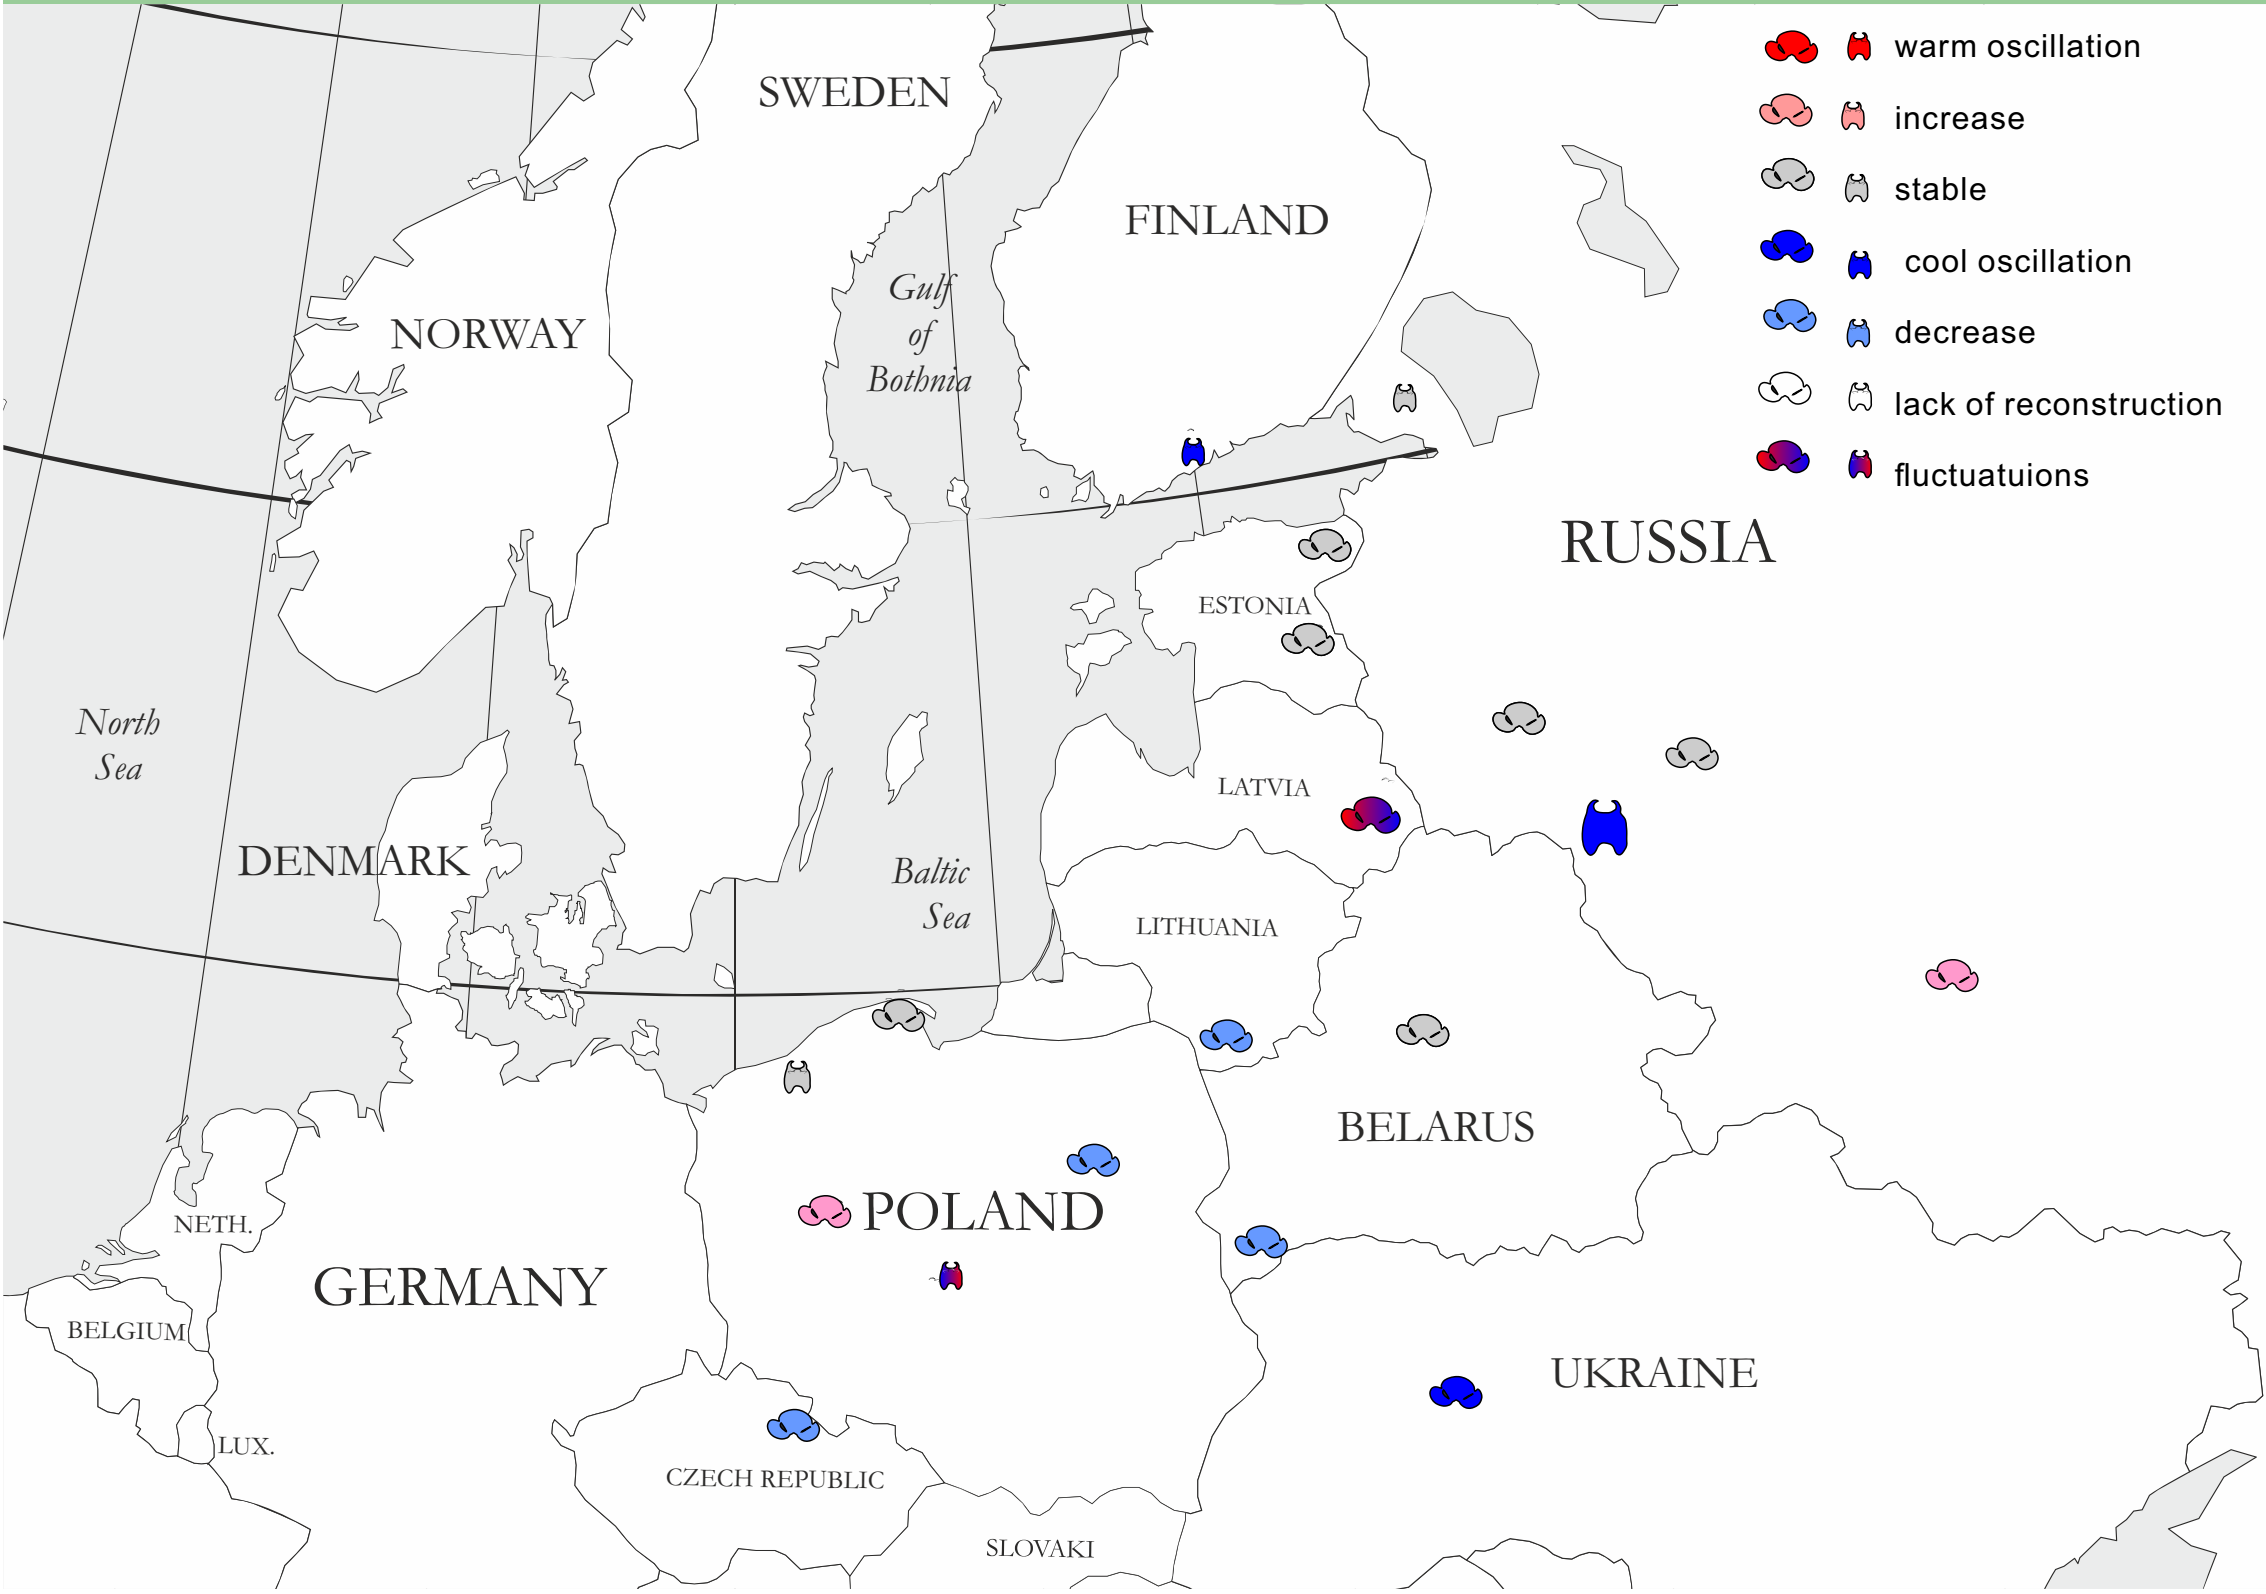

Temperature values of warmest month 5.9 ka cal. BP

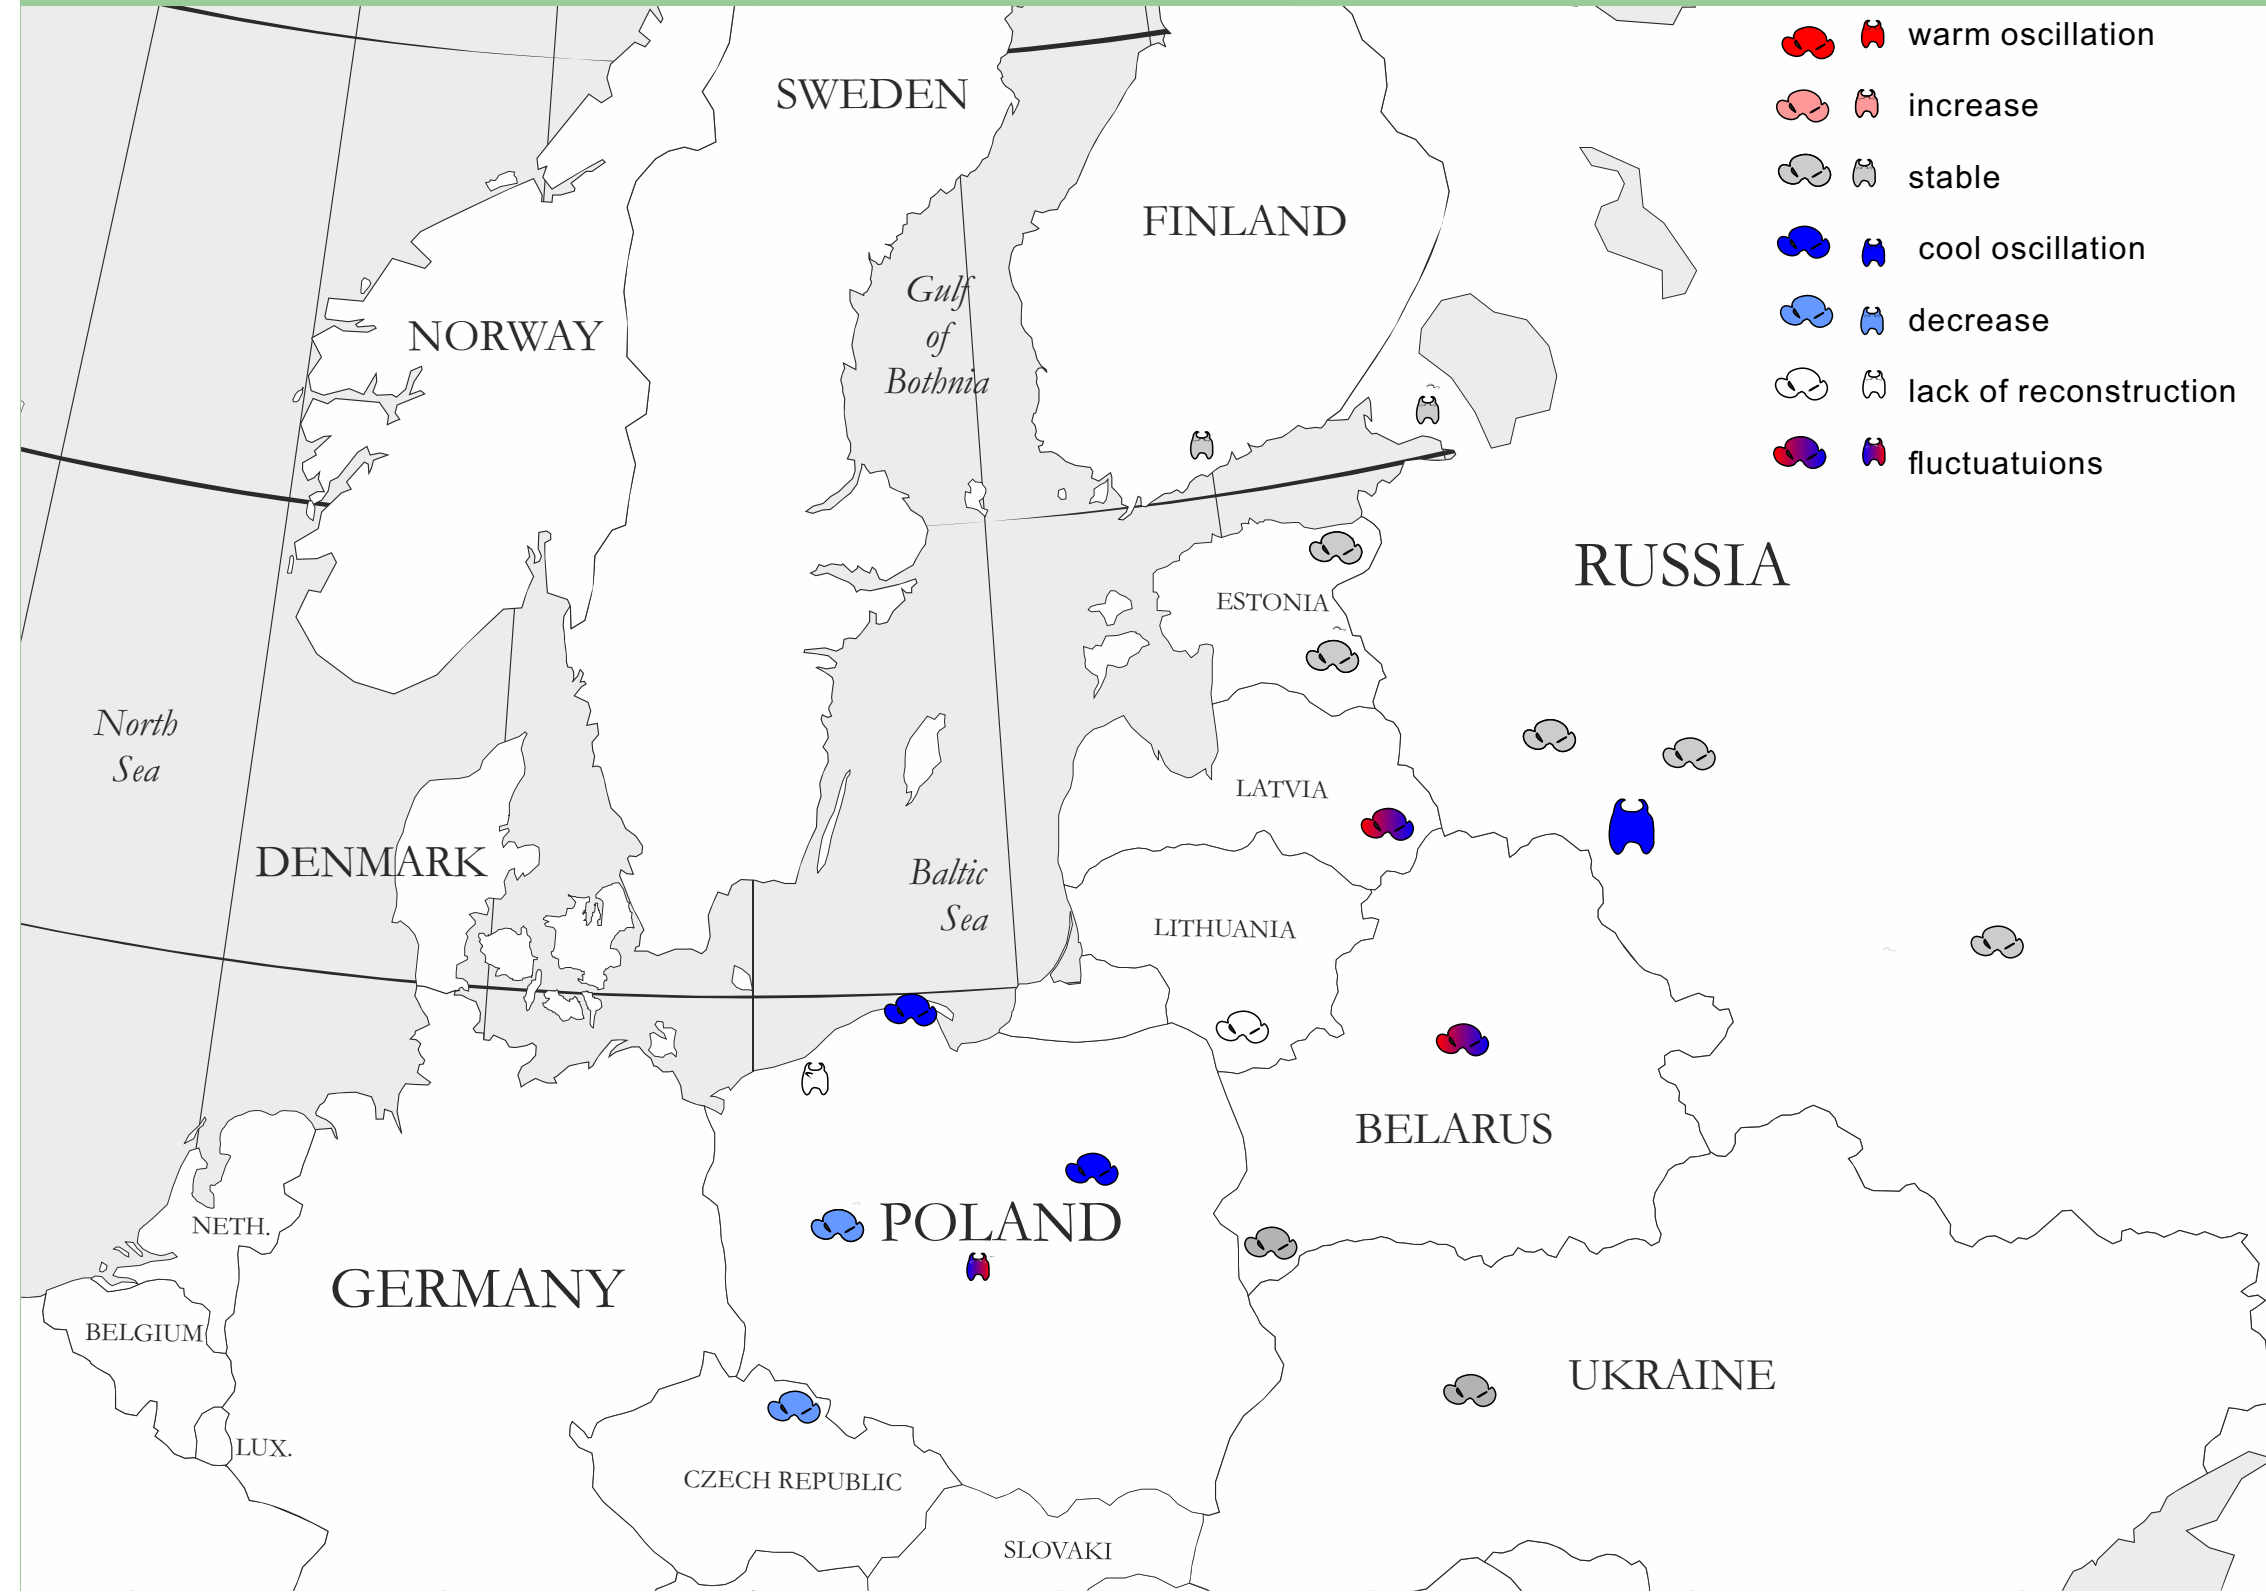

Temperature values of coldest month 4.2 ka cal. BP

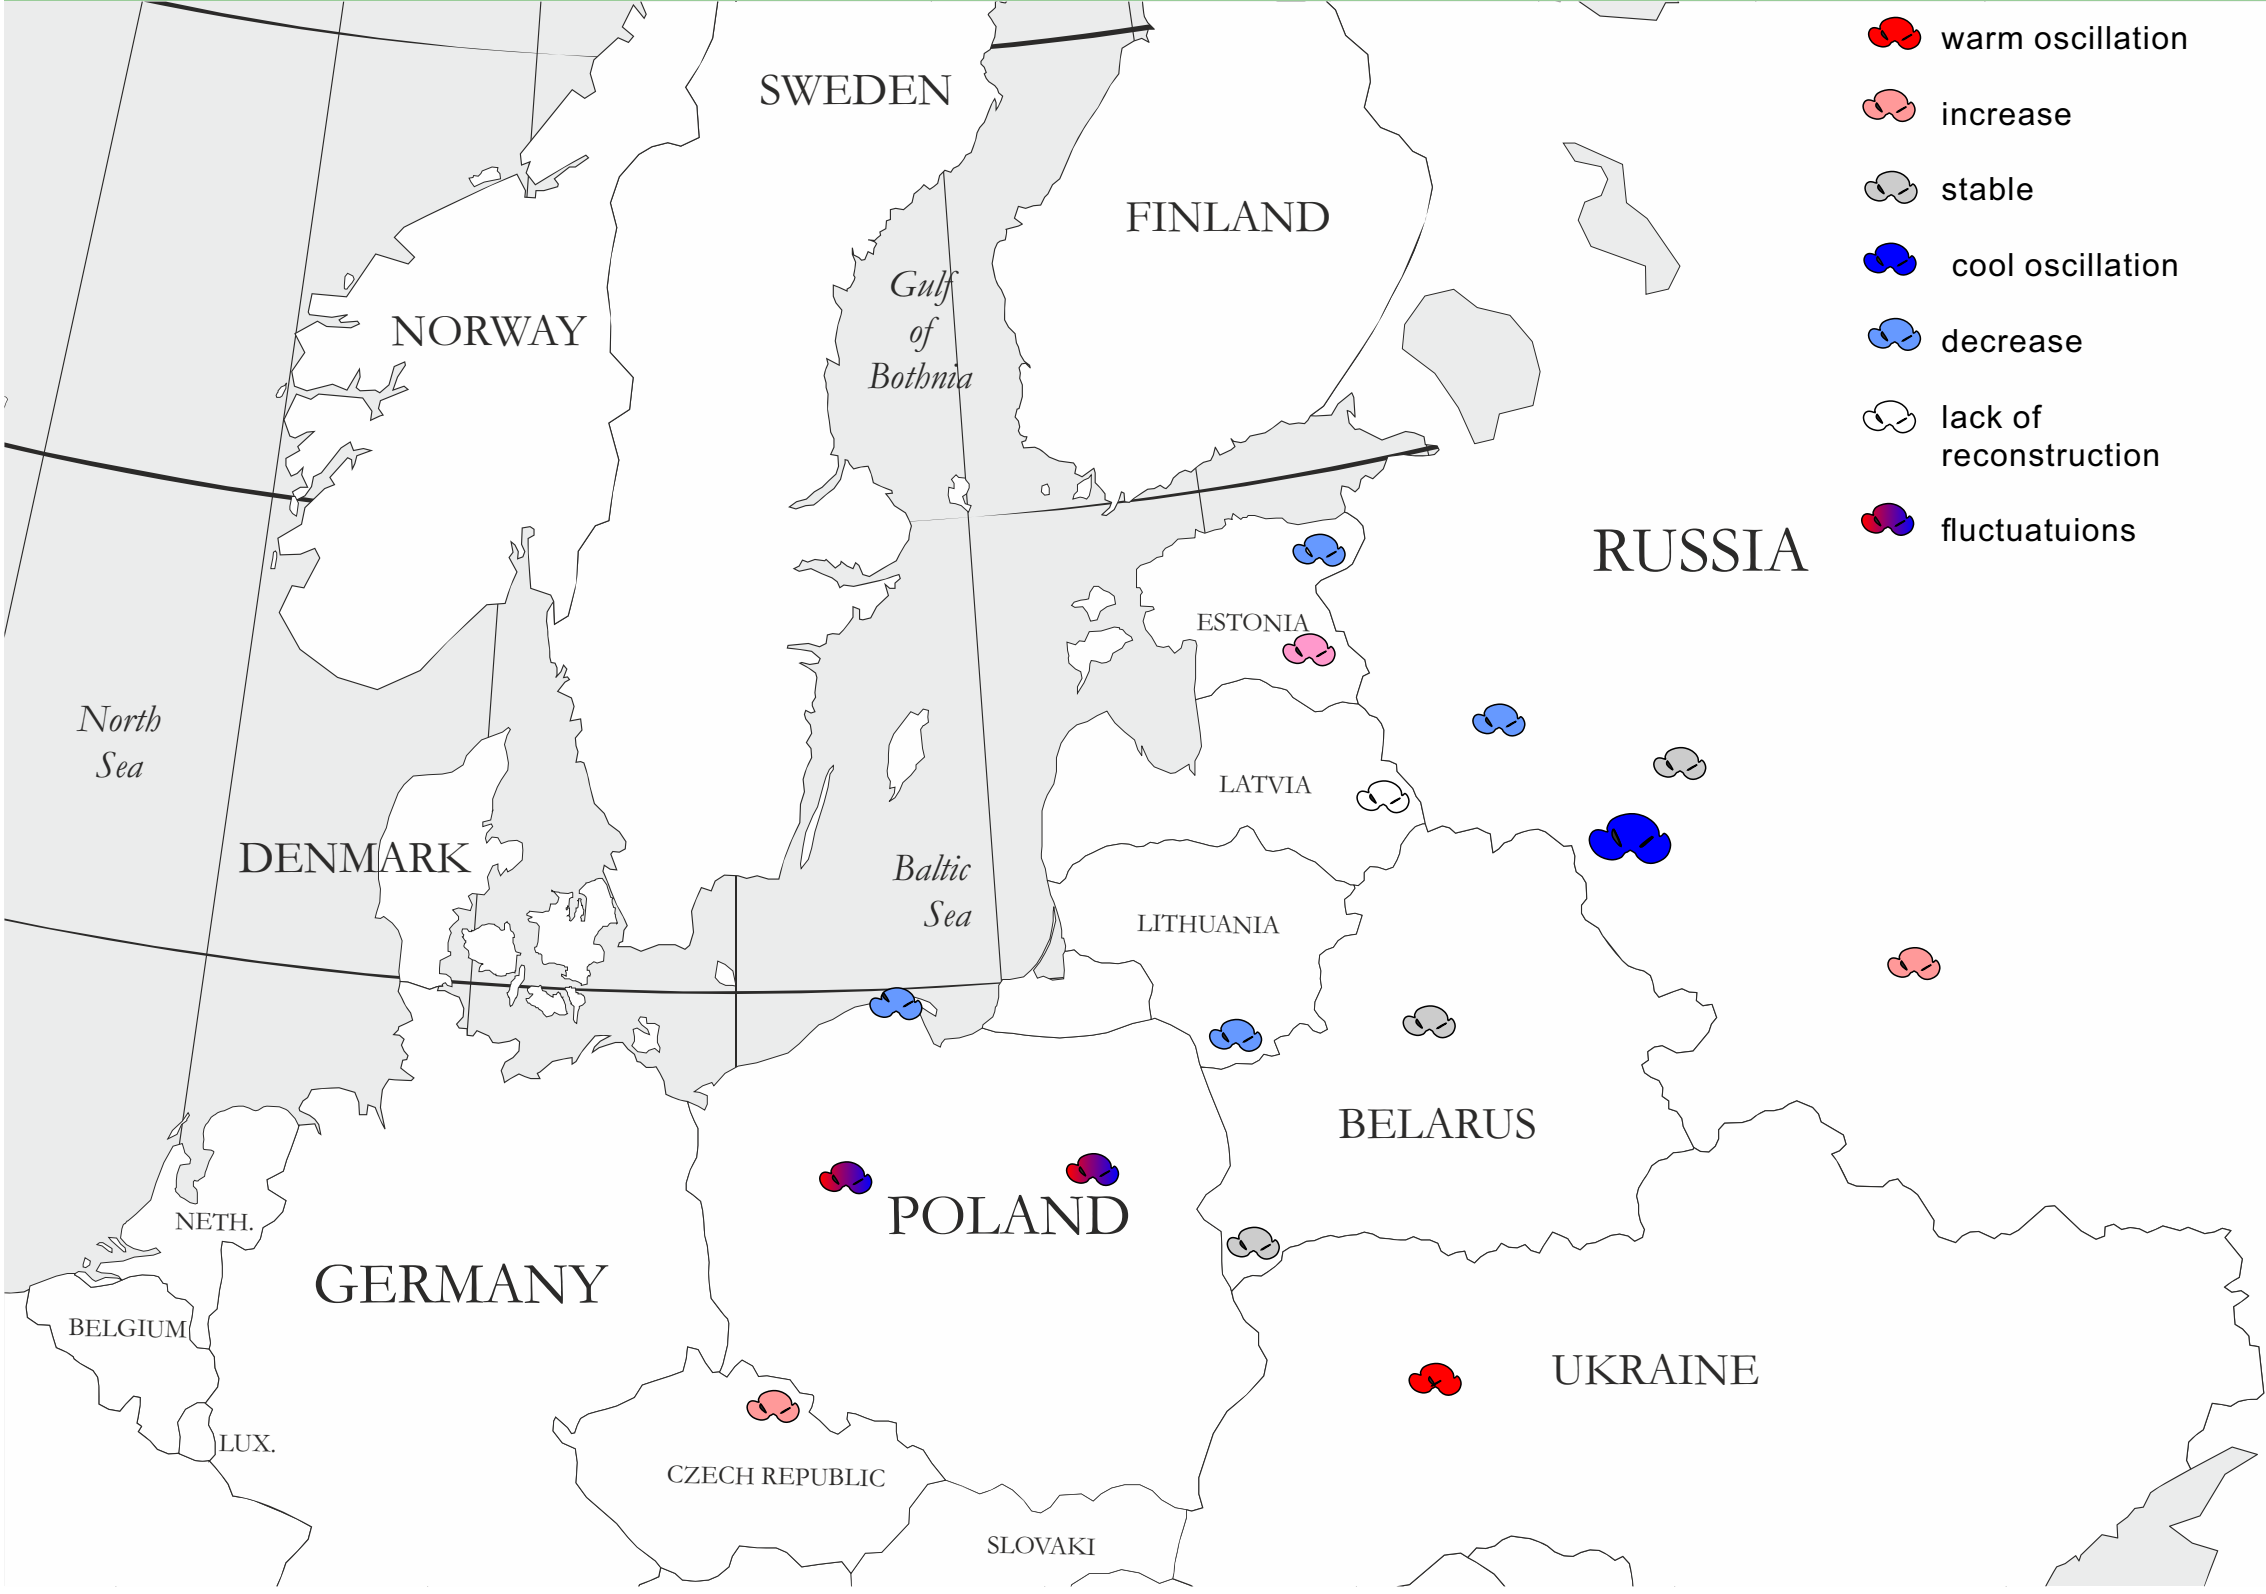

Temperature values of coldest month 5.9 ka cal. BP

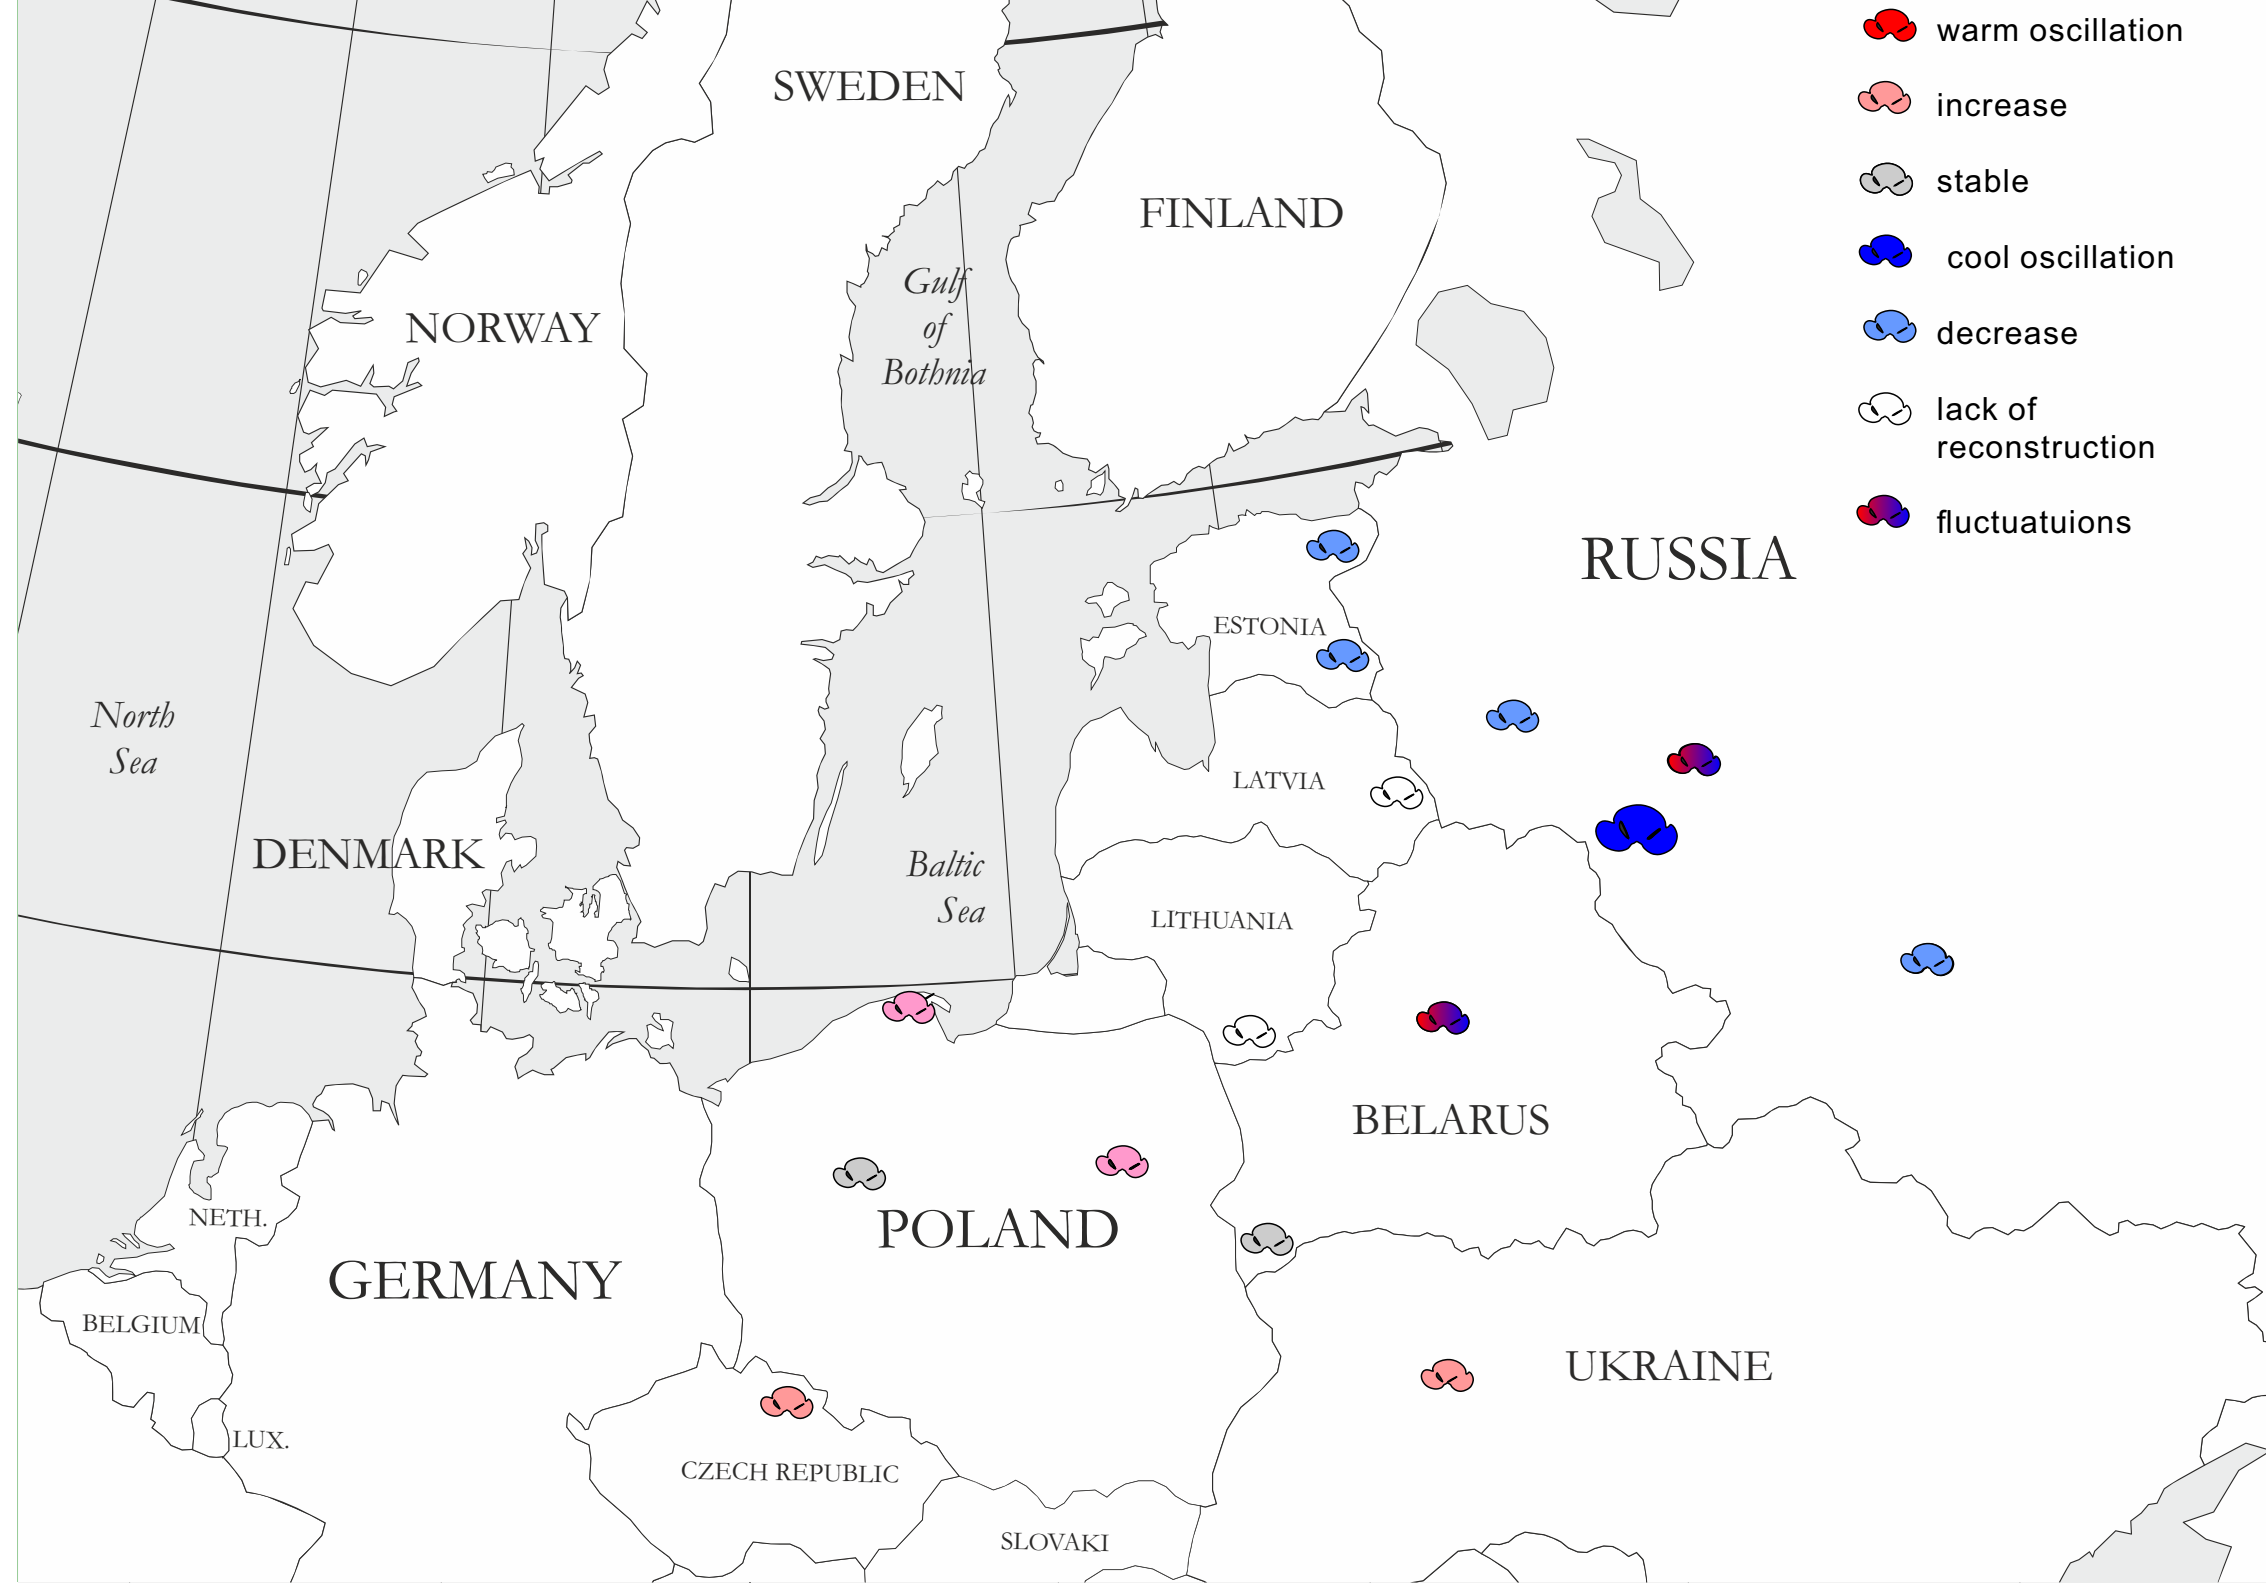

Precipitation and water level fluctuations 4.2 ka cal. BP

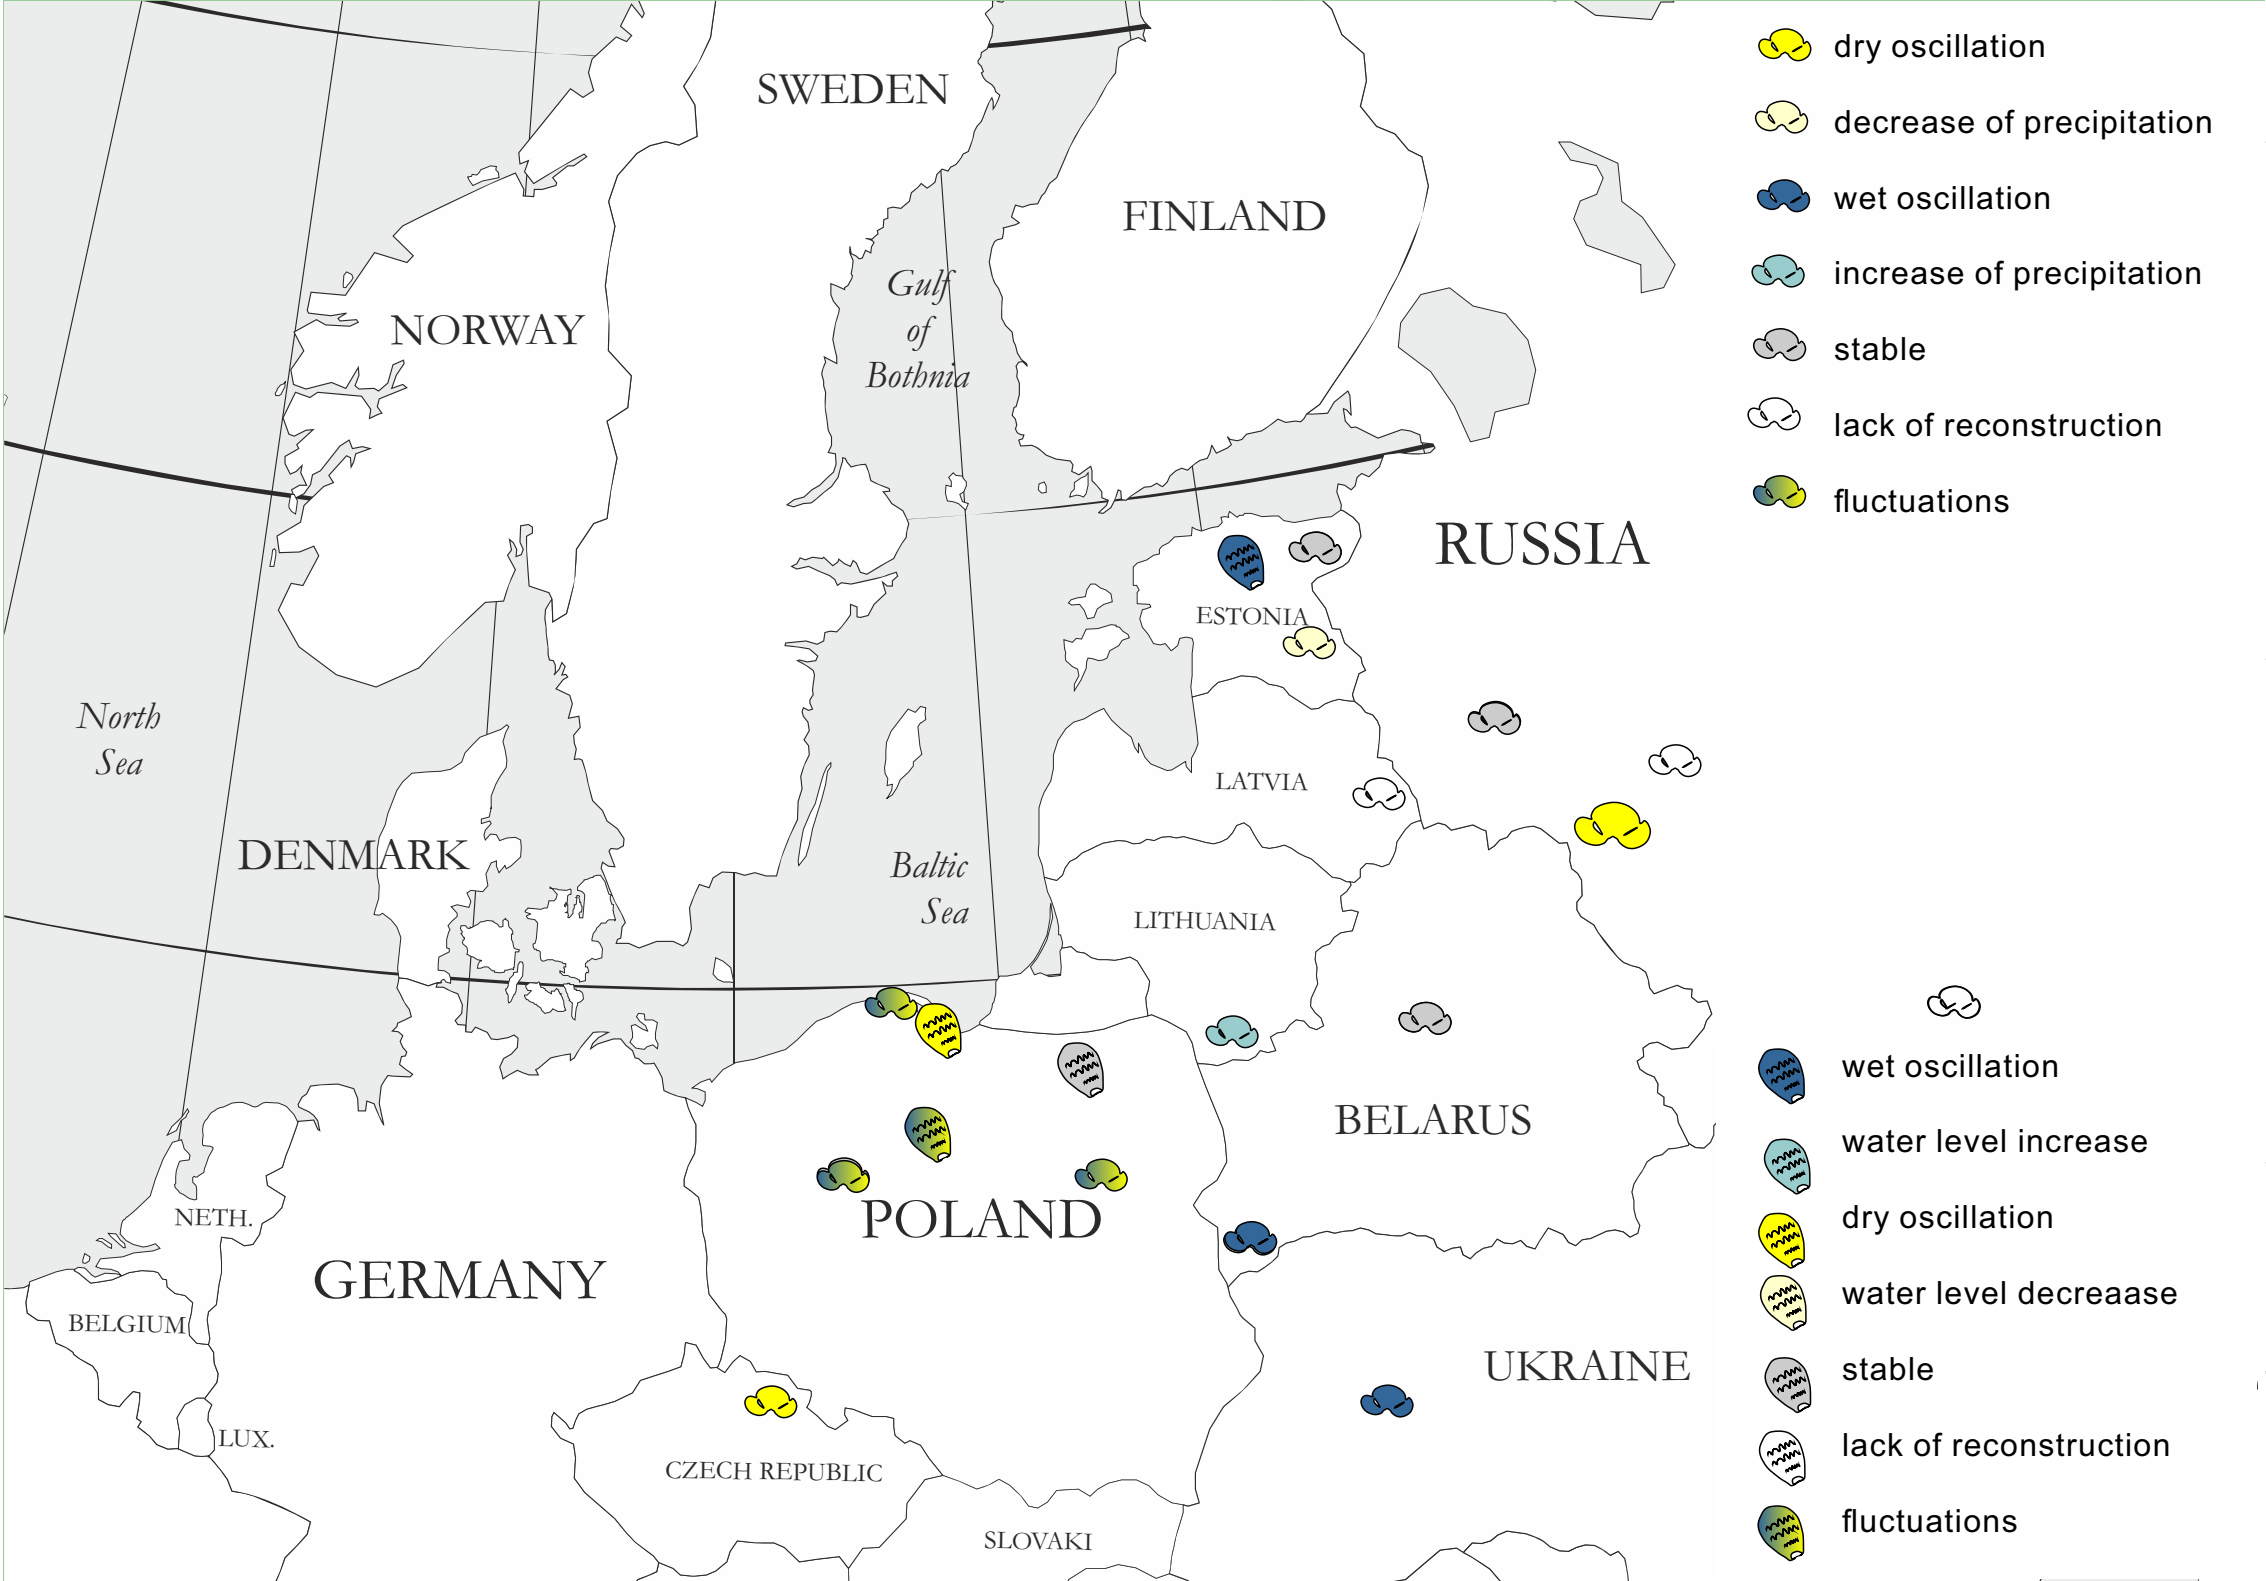

Precipitation and water level fluctuations 5.9 ka cal. BP

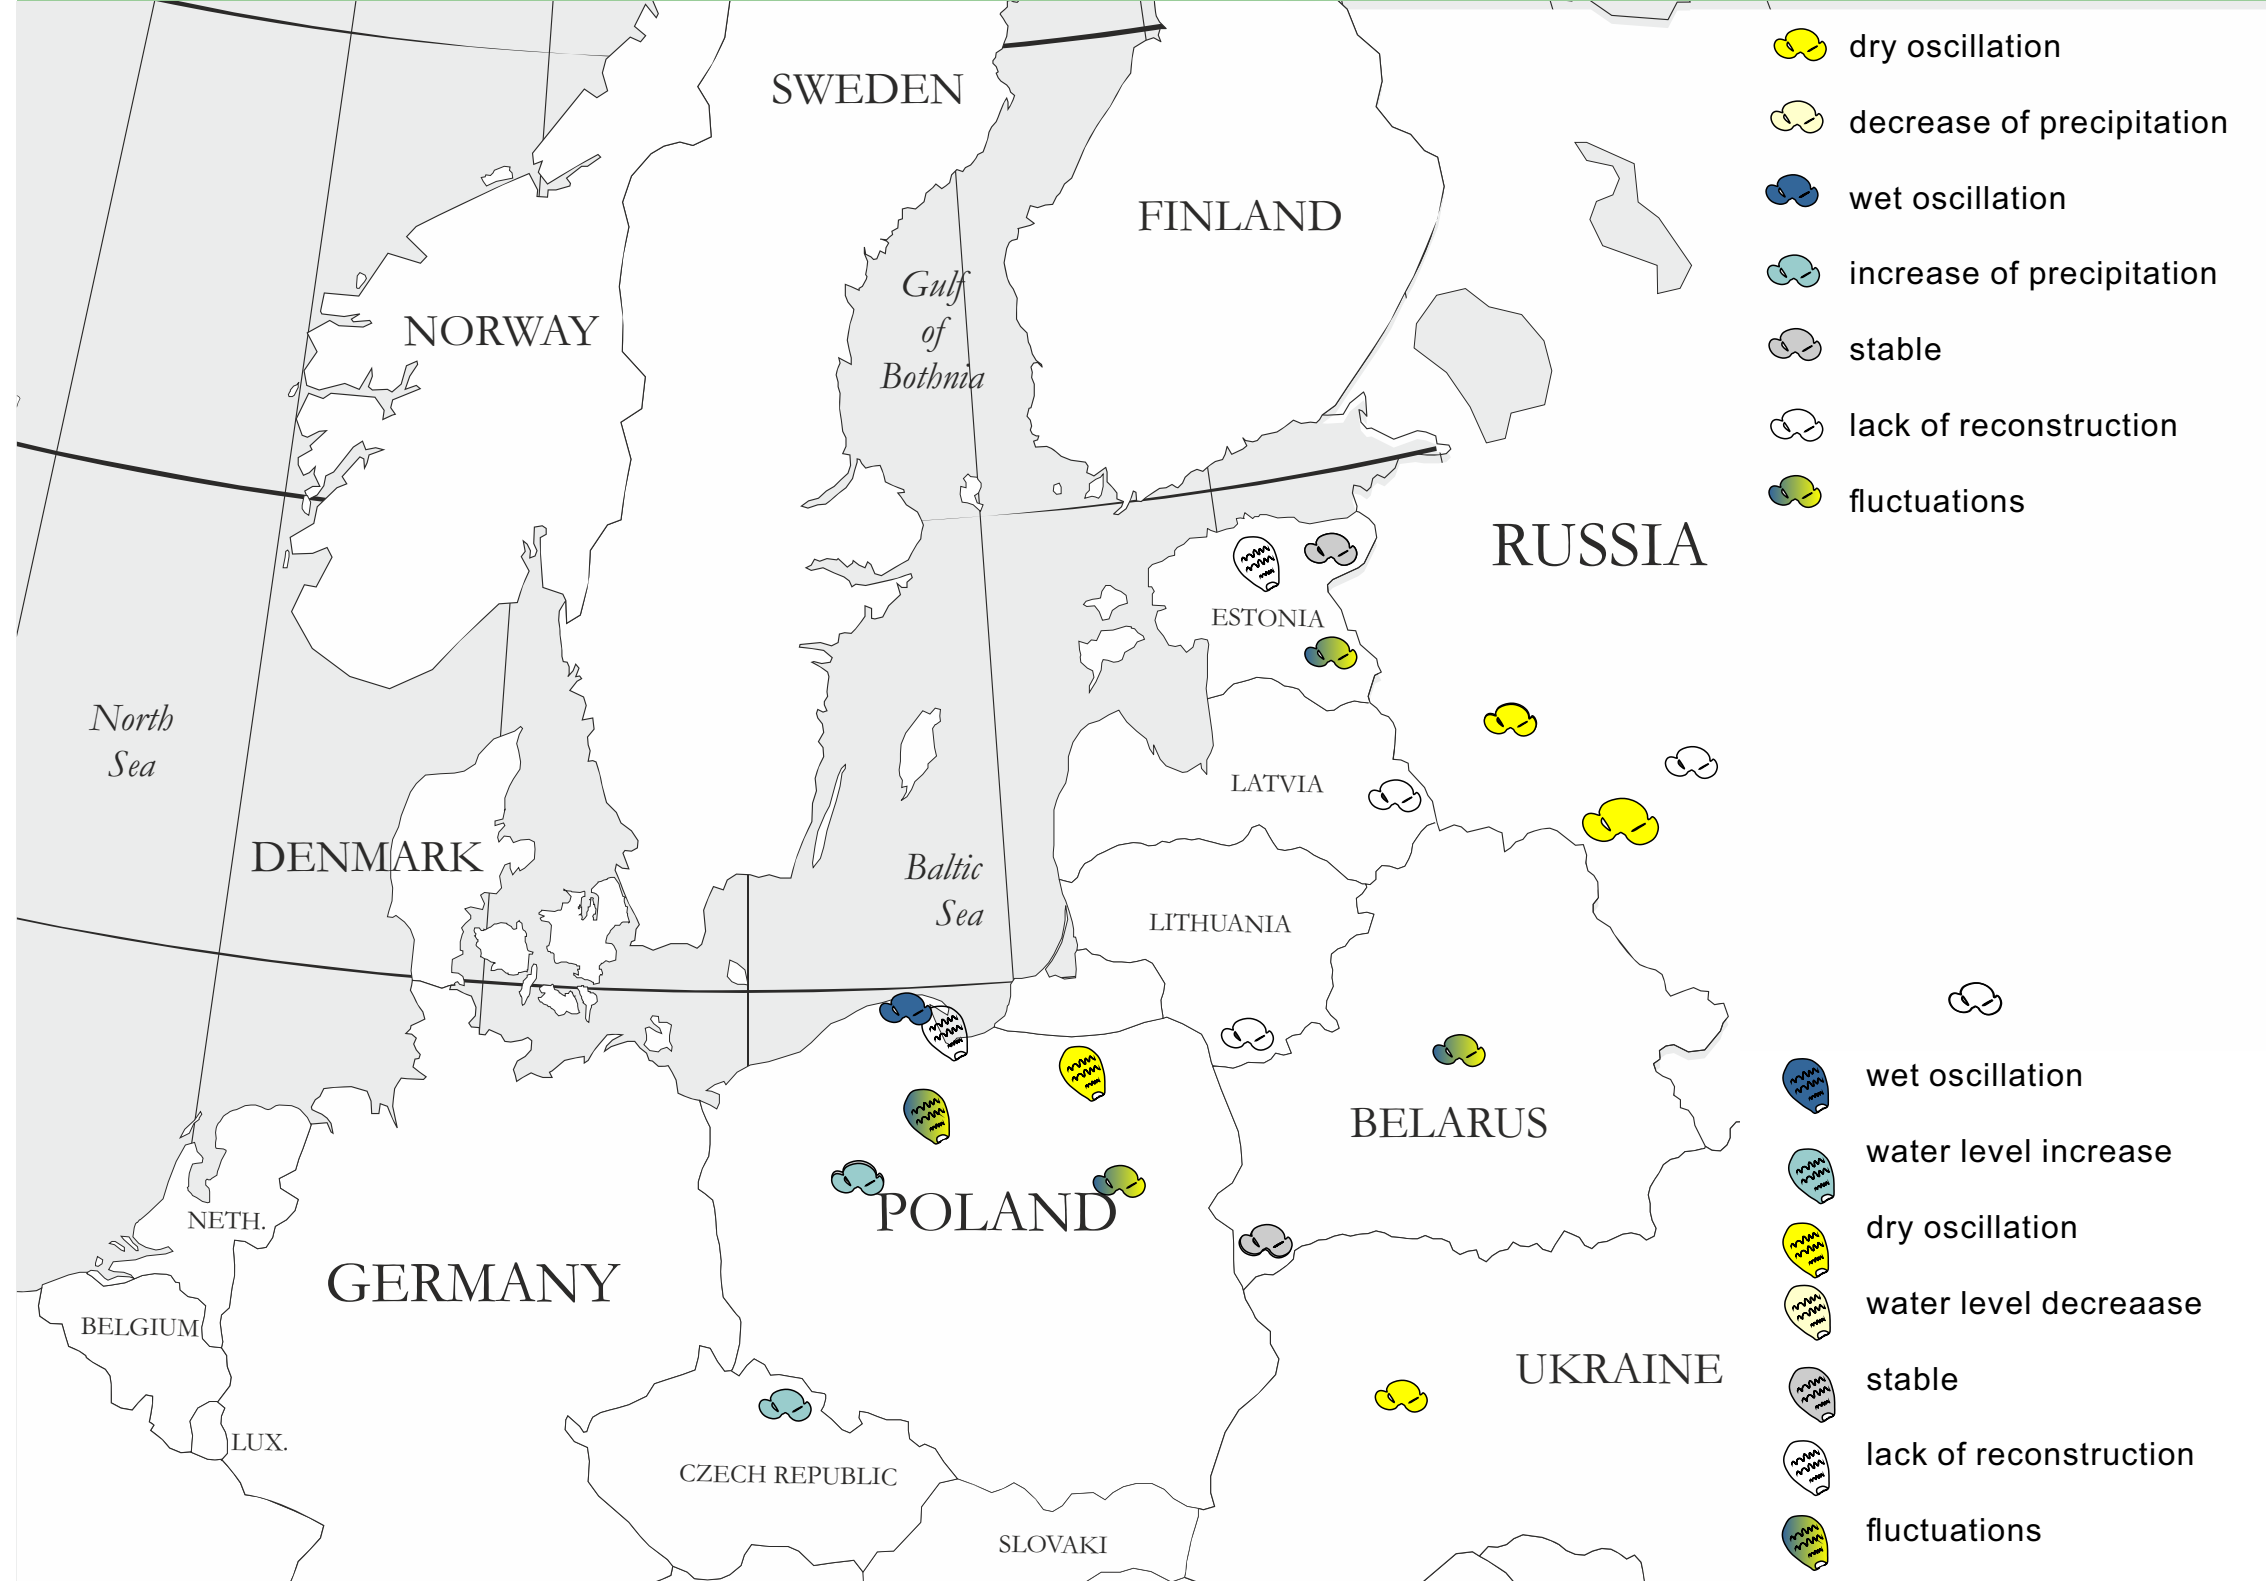

Supplement: s1 [file s1]
