# Supplementary material for: Middle Holocene Climate Oscillations Recorded in the Western Dvina Lakeland
Source: MDPI journal article supplement (doi:10.3390/w13111611), 2021-06-07
Supplement: s1 [file s1]

|                                                        | 4.2 ka cal BP event<br>(4.43-3.97 ka cal BP)                                                         |                                                                          |                                 |                                                          | 5.9 ka cal BP event<br>(6.0-5.75 ka cal PB)                              |                                    |                         |                                                                           |  |
|--------------------------------------------------------|------------------------------------------------------------------------------------------------------|--------------------------------------------------------------------------|---------------------------------|----------------------------------------------------------|--------------------------------------------------------------------------|------------------------------------|-------------------------|---------------------------------------------------------------------------|--|
|                                                        | before event                                                                                         | event                                                                    |                                 | after event                                              | before event                                                             | event                              |                         | after event                                                               |  |
|                                                        |                                                                                                      | CH-I,<br>P-I<br>temper<br>ature                                          | P-I<br>AnP                      |                                                          |                                                                          | CH-I,<br>P-I<br>temper<br>ature    | P-I<br>AnP              |                                                                           |  |
|                                                        |                                                                                                      | Temperature and precipitation fluctuations                               |                                 |                                                          |                                                                          |                                    |                         |                                                                           |  |
| 1. Hirvijärvi,<br>Finland [144]                        | 5.4-4.7 ka cal BP:<br>higher T Jul values                                                            | CH-I T<br>Jul<br>15.3°C<br>cooling<br>oscillation on<br>4.2 ka<br>cal BP | no<br>reconstruction            | 3.9-3.2 ka cal BP:<br>higher T Jul values                | 6.6 ka cal BP: the<br>same level of T Jul<br>values                      | CH-I T<br>Jul ca.<br>17°C          | no<br>reconstruction    | 5.6 ka cal BP: the<br>same level of T Jul<br>values                       |  |
| 2. Medvedevskoe,<br>Russia [8]                         | 5.5 ka cal BP: 14.7°C                                                                                | CH-I T<br>Jul<br>14.0°C                                                  | no<br>reconstruction            | 3.8 ka cal BP: 14.1°C                                    | 6.35 ka cal BP: the<br>same level of T Jul                               | CH-I T<br>Jul<br>14.6°C            | no<br>reconstruction    | 5.6 ka cal BP: the<br>same level of T Jul                                 |  |
| 3. Polistovo-Lovatskaya<br>mire system,<br>Russia [13] | 4.4-5.2 ka cal BP:<br>TWM similar values,<br>TCM similar to<br>higher records, AnP<br>similar values | P-I<br>TCM<br>ca. -<br>7°C<br>TWM<br>17.0-                               | P-I<br>AnP<br>670-<br>700<br>mm | 3.9-3.5 ka cal BP:<br>similar values of TCM,<br>TWM, AnP | 6.1-6.4 ka cal BP:<br>TCM and TWM<br>similar values; AnP<br>higher value | P-I<br>TCM -<br>4°C<br>TWM<br>18°C | P-I<br>AnP<br>620<br>mm | 5.6-5.5 ka cal BP:<br>lower TCM, similar<br>TWM and higher to<br>same AnP |  |

|                                    |                                                      |                                                                        |                                               |                                                                  |                                                                                       |                                                                                                       |                                                                                          |                                                         |
|------------------------------------|------------------------------------------------------|------------------------------------------------------------------------|-----------------------------------------------|------------------------------------------------------------------|---------------------------------------------------------------------------------------|-------------------------------------------------------------------------------------------------------|------------------------------------------------------------------------------------------|---------------------------------------------------------|
|                                    |                                                      | 17.5°C                                                                 |                                               |                                                                  |                                                                                       |                                                                                                       |                                                                                          |                                                         |
| 4. LLiivjarve Bog, Estonia [145]   | 5.2-4.6 ka cal BP: similar level of TCM, TWM and AnP | P-I TCM - 11.0°C to - 6.4°C TWM 16.3-16.5°C                            | P-I AnP 617-640 mm                            | 3.8-3.6 ka cal BP: similar to lower TCM, similar TWM, AnP        | 6.2-6.5 ka cal BP: similar level of AnP, TCM and TWM                                  | P-I TCM - 9.6°C to - 8.6°C-TWM ca.16.5 °C                                                             | P-I AnP ca. 635 mm                                                                       | 5.7-5.2 ka cal BP: lower TCM, similar TWM, AnP          |
| 5. Raigastvere Lake, Estonia [146] | 5.2-4.6 ka cal BP: similar level of TCM, TWM and AnP | P-I TCM - 10.7°C to - 9.7°C TWM 16.2-16.5°C except one outlier sample. | P-I AnP 640-680 mm except one outlier slampe. | 3.8-3.6 ka cal BP: similar to higher TCM, similar TWM, lower AnP | 6.4-6.2 ka cal BP: P-I TCM, TWM, AnP reveal similar values at values to 6.0 ka cal BP | P-I TCM - 2.6°C to 1.5°C on 6.0 ka cal BP and 5.85-5.75 ka cal BP, 0.8°C on 5.9 ka cal BP TWM variate | P-I AnP in two phases: ca. 775 mm on 6.0-5.9 ka cal BP and 885 mm on 5.85-5.75 ka cal BP | 5.6-5.4 ka cal BP: lower TCM, similar TWM and lower AnP |

|                                   |                                                                                                                                                                               |                                         |                       |                                                                                               |                                                                                                  |                            |                       |                                                                                         |
|-----------------------------------|-------------------------------------------------------------------------------------------------------------------------------------------------------------------------------|-----------------------------------------|-----------------------|-----------------------------------------------------------------------------------------------|--------------------------------------------------------------------------------------------------|----------------------------|-----------------------|-----------------------------------------------------------------------------------------|
|                                   |                                                                                                                                                                               |                                         |                       |                                                                                               |                                                                                                  | within<br>16.2-<br>17.4°C  |                       |                                                                                         |
| 6. LLake Kurjanova, Latvia [35]   | Two phases: first warm (4.43-4.2 ka cal BP) with +0.7°C of P-I sum. T, and second cool oscillation of -1C in P-I summer T at 4.0-3.9 ka cal BP comparing to 4.4-5.0 ka cal BP |                                         | no reconst<br>ruction | 3.9-3.8 ka cal BP: higher T summer (ca. + 1°C), 3.7-3.5 ka cal BP: similar values of T summer | Gradual decreasing trend of P-I summer T compared to 6.4-6.2 ka cal BP but no clear oscillation. |                            | no reconst<br>ruction | ca. 5.6 ka cal BP: lower T summer by - 0.7°C, 5.5 ka cal BP: similar values of T summer |
| 7. Staroselsky Moch, Russia [137] | 5.2-4.5 ka cal BP: similar level                                                                                                                                              | P-I TCM - 9.5- - 5.9°C TWM 17.5- 18.7°C | no reconst<br>ruction | 3.9-3.7 ka cal BP: similar values of TCM and TWM                                              | 6.1-6.5 ka cal BP: similar level of TWM and much lower TCM                                       | P-I TCM - 4.4°C TWM 17.5°C | no reconst<br>ruction | 5.7-5.4 ka cal BP: high variability of TCM and similar values of TWM                    |
| 8. Peatland Klukva, Russia [14]   | 5.2-4.5 ka cal BP: similar level of TCM and TWM                                                                                                                               | P-I TCM - 5.8°C to - 4.4°C TWM 18.0-    | no reconst<br>ruction | 3.8-3.4 ka cal BP: higher TCM and similar to higher TWM                                       | 6.2-6.5 ka cal BP: higher values of TCM and similar level of TWM                                 | P-I TCM - 4.8°C TWM 18.9°C | no reconst<br>ruction | 5.6-5.2 ka cal BP: similar TCM and TWM                                                  |

|                                |                                                           |                                            |                     |                                                           |                                                                                                                                                                                            |                                                                                                                       |                                                          |                                                                           |
|--------------------------------|-----------------------------------------------------------|--------------------------------------------|---------------------|-----------------------------------------------------------|--------------------------------------------------------------------------------------------------------------------------------------------------------------------------------------------|-----------------------------------------------------------------------------------------------------------------------|----------------------------------------------------------|---------------------------------------------------------------------------|
|                                |                                                           | 18.6°C                                     |                     |                                                           |                                                                                                                                                                                            |                                                                                                                       |                                                          |                                                                           |
| 9. Sudoble Lake, Belarus [147] | 5.0-4.7 ka cal BP: similar values of P-I TCM, TWM and AnP | P-I TCM - 7.2°C to -8°C<br>TWM 15.9-16.5°C | P-I AnP ca. 632 mm, | 3.8-3.4 ka cal BP: TCM, TWM and AnP reveal similar values | 6.5-6.2 ka cal BP: TCM values are lower compared to 6.0 ka cal BP and much higher compared to 5.9 ka cal BP; TWM reveal variable values on 6.5-6.2 ka cal BP; AnP reveal big fluctuations. | P-I TCM - 2.7°C on 6.0 ka cal BP<br>-7.2°C on 5.9 ka cal BP<br>TWM 17.6°C on 6.0 ka cal BP<br>15.9°C on 5.9 ka cal BP | P-I AnP variate from 734 to 630mm (6.0 to 5.9 ka cal BP) | 5.7-5.4 ka cal BP: similar to lower TCM, similar and variable TWM and AnP |

|                                    |                                                                                                                                                   |                                             |                                                                  |                                                                             |                                                                                 |                                |                 |                                                                     |
|------------------------------------|---------------------------------------------------------------------------------------------------------------------------------------------------|---------------------------------------------|------------------------------------------------------------------|-----------------------------------------------------------------------------|---------------------------------------------------------------------------------|--------------------------------|-----------------|---------------------------------------------------------------------|
| 10. Bebrukas Lake, Lithuania [148] | 5.2-4.8 ka cal BP: sharp decrease of TCM and TWM and increase of AnP starting on 4.5 ka cal BP                                                    | P-I TCM - 5°C to - 8.5°C<br>TWM 16.2-16.8°C | P-I AnP 590-630 mm;                                              | 3.9-3.6 ka cal BP: similar values of TCM, TWM, AnP                          |                                                                                 | no data                        | no data         |                                                                     |
| 11. Darzlubie Bog, Poland [149]    | 4.8-4.55 ka cal BP: P-I TCM, TWM on similar level; AnP reveal long-time fluctuations                                                              | P-I TCM 1.5°C<br>TWM 16.4-16.8°C;           | P-I AnP stays on ca. 815 mm fluctuations from 4.8-4.55 ka cal BP | 3.8-3.4 ka cal BP: lower to similar TCM, similar TWM, higher to similar AnP | 6.4 ka cal BP: similar values of TCM, higher values of TWM, lower values of AnP | P-I TCM - 0.4°C<br>TWM 17.5°C; | P-I AnP 904 mm; | 5.7-5.2 ka cal BP: similar to higher TCM, TWM, similar to lower AnP |
| 12. Lake Spore, Poland [135]       | CH-I T Jul<br>variate within 18–19 °C; Slightly higher temperatures, reaching up to 20 °C were reconstructed at ~3.9–4.05 and 4.18–4.27 cal ka BP |                                             |                                                                  |                                                                             |                                                                                 | no data                        | no data         |                                                                     |
| 13. Oltush Lake, Belarus [150]     | 5.6-4.7 ka cal BP: TCM on the similar level, TWM higher                                                                                           | P-I TCM -                                   | P-I AnP 743                                                      | 3.8-3.4 ka cal BP: similar to lower TCM, TWM, lower AnP                     | 6.4 ka cal BP: TCM, TWM and AnP on similar level                                | P-I TCM -                      | P-I AnP 571 mm. | 5.6 ka cal BP: similar TCM, TWM and AnP                             |

|                                |                                                                                  |                                                               |                                                                                                                 |                                                                                                                                                                                         |                                                                                       |                                                                                            |                                                 |                                                                             |
|--------------------------------|----------------------------------------------------------------------------------|---------------------------------------------------------------|-----------------------------------------------------------------------------------------------------------------|-----------------------------------------------------------------------------------------------------------------------------------------------------------------------------------------|---------------------------------------------------------------------------------------|--------------------------------------------------------------------------------------------|-------------------------------------------------|-----------------------------------------------------------------------------|
|                                | values ca. 18.0°C;<br>AnP - much lower values                                    | 2.3°C<br>TWM<br>17.3°C                                        | mm;                                                                                                             |                                                                                                                                                                                         |                                                                                       | 2.9°C<br>TWM<br>18.0°C                                                                     |                                                 |                                                                             |
| 14. Błędowo Lake, Poland [151] | 5.2-4.5 ka cal BP: TCM and TWM keep decreasing trend toward 4.2 ka cal BP event; | P-I TCM - 4.4°C to - 0.8°C TWM decrease from 20°C to 15.51°C; | At first phase the same P-I AnP compared to 5.7-4.43 ka cal BP (622-706 mm), at second phase increase to 894 mm | 3.9-3.6 ka cal BP: similar values of TCM and TWM but much lower variability; AnP of similar values to first phase of 4.2 ka cal BP event and much lower than in the second phase of one | 6.5-6.1 ka cal BP: higher TCM; 6.1 ka cal BP higher TWM; 6.5-6.2 ka cal BP higher AnP | P-I TCM - 6.0°C on 5.9 ka cal BP TWM 15.7°C on 5.8 ka cal BP Clear cold oscillation summer | P-I AnP ca. 620 mm exactly on 6.0-5.8 ka cal BP | after 5.9 ka cal BP event TCM and TWM sharply increase, AnP variable        |
| 15. Żabieniec Bog, Poland [20] | 5.0-4.6 ka cal BP: T Jul reveal slightly higher values - ca. 16.7-17.2°C         | CH-I T Jul fluctuates 15.9-                                   | No data                                                                                                         | 3.9-3.5 ka cal BP: generally similar values of T Jul: 15.3-16.9°C except outlier on 3.8 ka                                                                                              | 6.6-6.2 ka cal BP: values higher then on 6.0 ka cal BP                                | CH-I TJul is 14.0°C exactly on 6.0                                                         | No data                                         | 5.6-5.2 ka cal BP: similar values as in second phase of 5.9 ka cal BP event |

|                                     |                                                                                                     |                                                                             |                                                                         |                                                                                                        |                                                          |                                                                              |                    |                                                                                   |
|-------------------------------------|-----------------------------------------------------------------------------------------------------|-----------------------------------------------------------------------------|-------------------------------------------------------------------------|--------------------------------------------------------------------------------------------------------|----------------------------------------------------------|------------------------------------------------------------------------------|--------------------|-----------------------------------------------------------------------------------|
|                                     |                                                                                                     | 16.9°C                                                                      |                                                                         | cal BP (13.8°C)                                                                                        |                                                          | ka cal BP, in second phase of 5.9 ka event, temperature increases to 16.5°C; |                    |                                                                                   |
| 16. Biskupińskie Lake, Poland [152] | 5.2 -4.5 ka cal BP: TCM and TWM on similar level; AnP at similar level to second phase of 4.2 event | P-I TCM - 5.0°C to - 3.0°C TWM with increasing trend from 15.8°C to 19.2°C; | P-I AnP: at first phase high value (818 mm) then much lower ca. 550 mm; | 3.9-3.6 ka cal BP: TCM, TWM ranging in variability of 4.2 ka cal BP event to higher values, AnP higher | 6.0-6.4 ka cal BP: TCM, TWM and AnP on the similar level | P-I TCM - 3.7°C to - 5.1°C TWM 18.0-17.1°C;                                  | P-I AnP: ca 590 mm | 5.7-5.2 ka cal BP: TCM, TWM similar to lower values, AnP similar to higher values |

|                                       |                                                                                       |                                                                                   |                                                                                              |                                                              |                                                                       |                                  |                        |                                                           |
|---------------------------------------|---------------------------------------------------------------------------------------|-----------------------------------------------------------------------------------|----------------------------------------------------------------------------------------------|--------------------------------------------------------------|-----------------------------------------------------------------------|----------------------------------|------------------------|-----------------------------------------------------------|
| 17. Zalozhtsy, Ukraine [153]          | 5.1 ka cal BP: TCM lower, TWM higher and AnP substantially lower then on 4.2 ka event | P-I<br>TCM - 0.9°C<br>TWM 15.3°C                                                  | P-I<br>AnP 1110 mm                                                                           | 3.4 ka cal BP: TCM, AnP reveal lower, TWM higher values      | 6.6 ka cal BP: TCM and TWM on similar level, substantially higher AnP | P-I<br>TCM - 3.9°C<br>TWM 16.0°C | P-I<br>AnP 830mm       | 5.1 ka cal BP: TCM, AnP reveal higher, TWM similar values |
| 18. Verněřovice, Czech Republic [154] | 4.9 ka cal BP: similar values of TCM and TWM, slightly higher values of AnP           | P-I<br>TCM - 9.0 °C<br>TWM 16.3°C                                                 | P-I<br>AnP 654 mm                                                                            | 3.3 ka cal BP: TCM, AnP reveal much higher, TWM lower values | 6.3 ka cal BP: lower TCM, higher TWM and lower AnP (630 mm)           | P-I<br>TCM - 7.8°C<br>TWM 15.8°C | P-I<br>AnP: ca. 760 mm | 5.8 ka cal BP: TCM, AnP reveal higher, TWM similar values |
| fluctuations of water level           |                                                                                       |                                                                                   |                                                                                              |                                                              |                                                                       |                                  |                        |                                                           |
|                                       | before event                                                                          | 4.2 ka cal BP event (4.43-3.97 ka cal BP)                                         | after event                                                                                  | before event                                                 | 5.9 ka cal BP event (6.0-5.75 ka cal PB)                              | after event                      |                        |                                                           |
| 19. Männikjärve bog, Estonia [155]    | no data                                                                               | TA-I DWT (Testate Amoebae-Inferred water table depth (cm)) reveal wet oscillation | 3.9-3.7 ka cal BP: DWT reveal much drier conditions with tendency to decrease of water table |                                                              | no data                                                               |                                  |                        |                                                           |



|                               |                                                                                                                                        |                             |                                                         |                                |                                                     |                                                                            |
|-------------------------------|----------------------------------------------------------------------------------------------------------------------------------------|-----------------------------|---------------------------------------------------------|--------------------------------|-----------------------------------------------------|----------------------------------------------------------------------------|
| 20. Głębocek,<br>Poland [156] | DWT on 4.2 ka cal BP event similar water level comparing to 4.3-4.5 ka cal BP and 3.8-3.4 ka cal BP, wetter than multi-millennial mean |                             |                                                         | 6.2 ka cal BP: wet oscillation | DWT on 5.9 ka cal BP event on multi-millennial mean | 5.4 ka cal BP: dry oscillation                                             |
| 21. Stążki,<br>Poland [34]    | 3.7-3.4 ka cal BP: increase of water table                                                                                             | TA-I DWT dry oscillation    | 4.4.-4.7 ka cal BP: water level on multi-century mean   |                                |                                                     |                                                                            |
| 22. Gązwa,<br>Poland [33]     | 4.4-4.8 ka cal BP: water level on multi-millennial mean                                                                                | TA-I DWT small fluctuations | 3.9-3.5 ka cal BP: water level on multi-millennial mean |                                | TA-I DWT clear dry oscillation                      | 5.8: clear wet oscillation then water level stays on multi-millennial mean |
